# Supplementary material
Source: PubMed Central journal article supplement (PMC5729902)

Supplement 1: Age-standardised 5-year RS for oesophageal cancer in a) Northern Europe, b) UK and Ireland, c) Central Europe, d) Southern Europe, e) Eastern Europe and f) European average.

a)

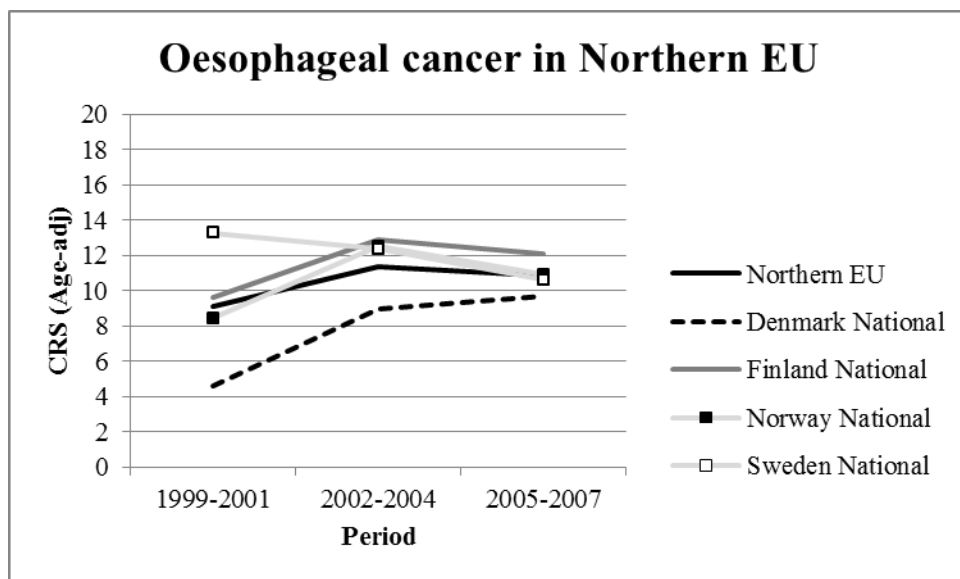

Note: Iceland removed as no points are available due to small number of cases

b)

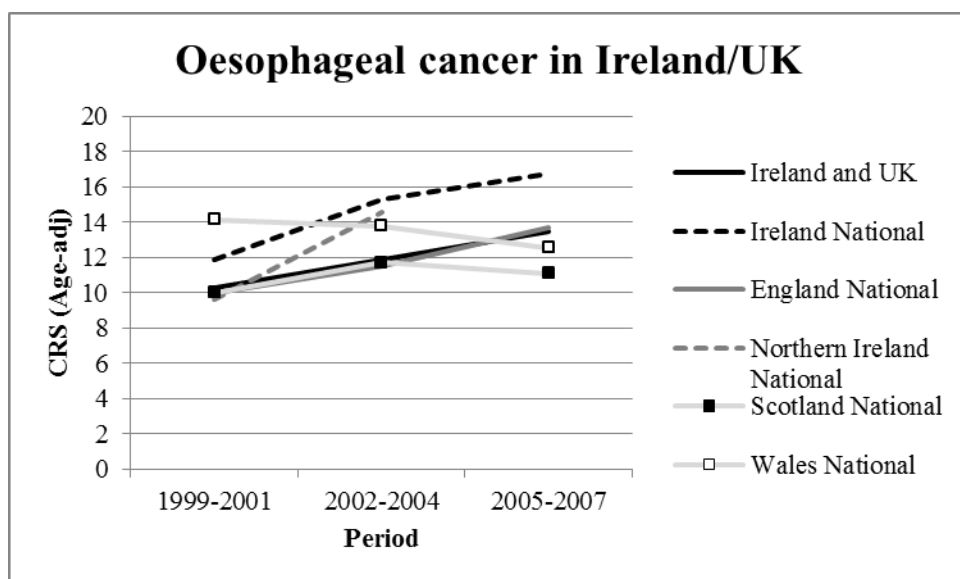

c)

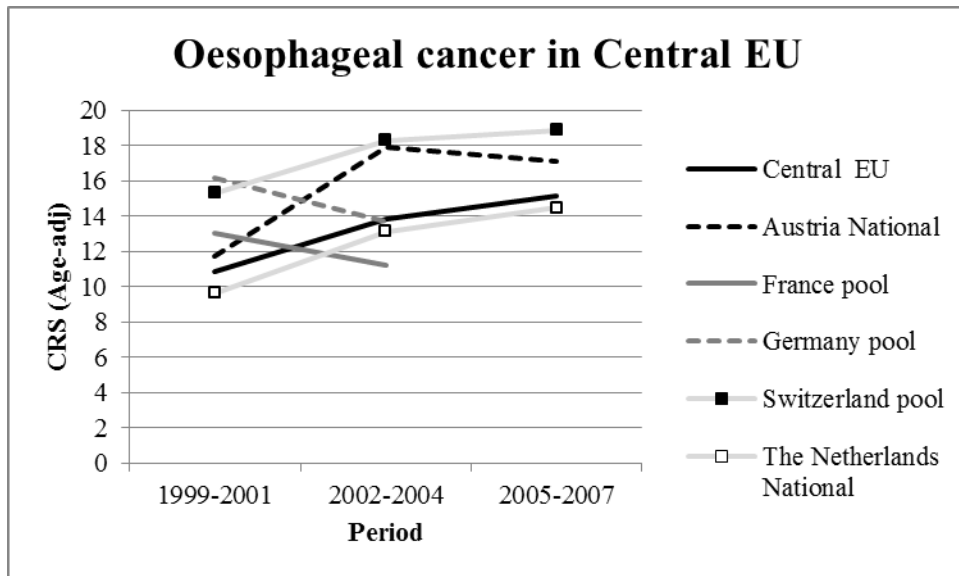

d)

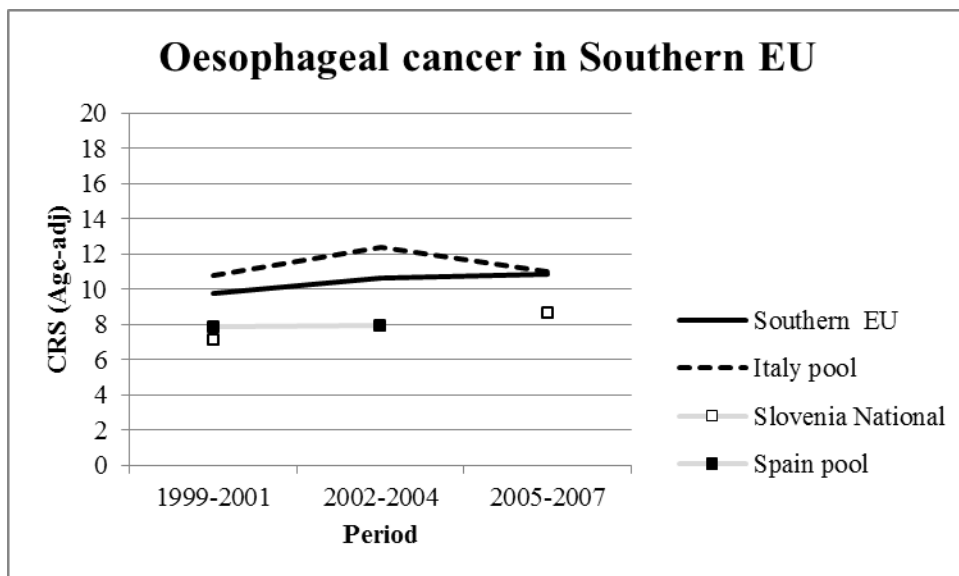

Note: Malta removed as no points are available due to small number of cases

e)

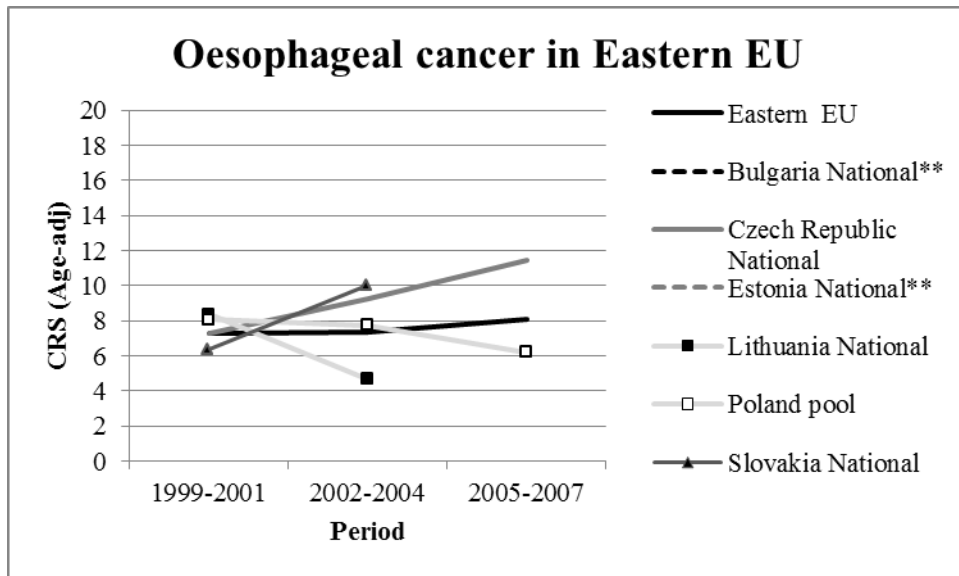

f)

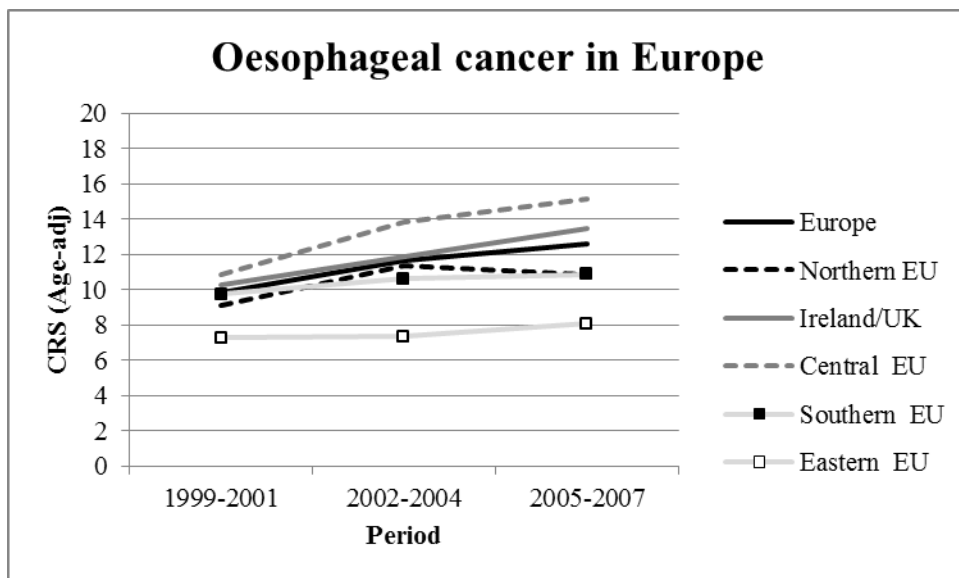

Supplement: NIHMS900952-supplement-1.pdf [file NIHMS900952-supplement-1.pdf]
