# Supplementary material
Source: PubMed Central journal article supplement (PMC5729902)
Supplement: NIHMS900952-supplement-2.pdf [file NIHMS900952-supplement-2.pdf]

Supplement 2: Age-standardised 5-year RS for stomach cancer in a) Northern Europe, b) Ireland and UK, c) Central Europe, d) Southern Europe, e) Eastern Europe and f) European average.

a)

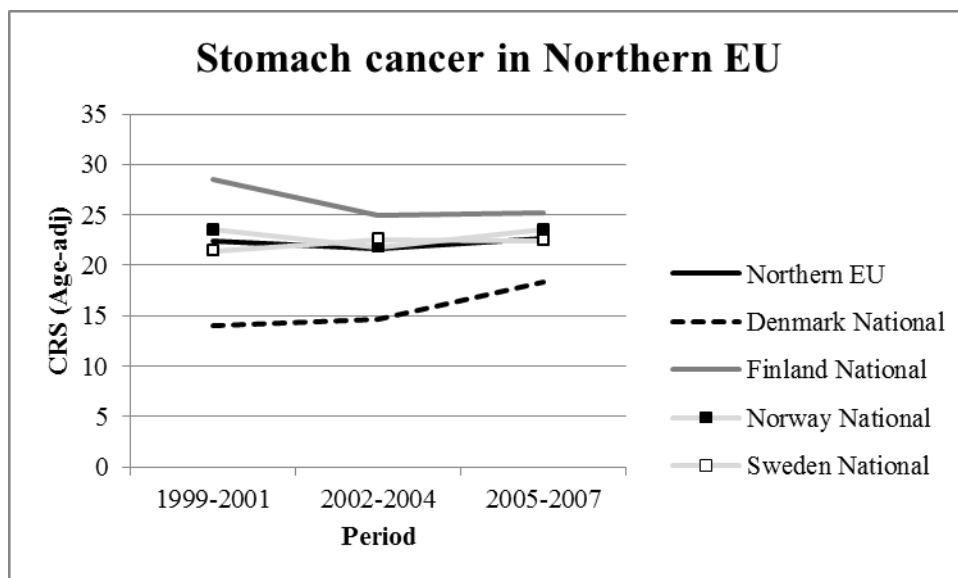

Note: Iceland removed as no points are available due to small number of cases

b)

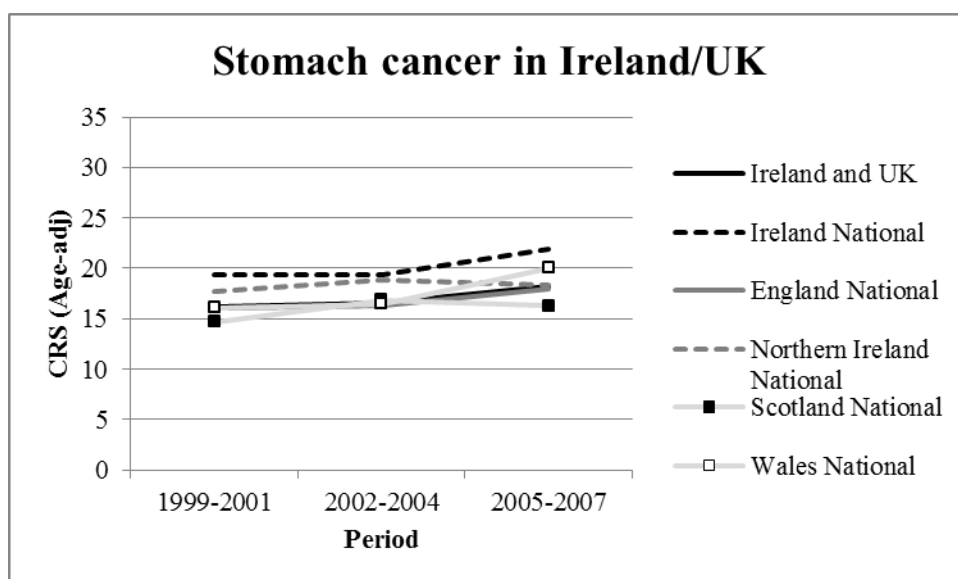

c)

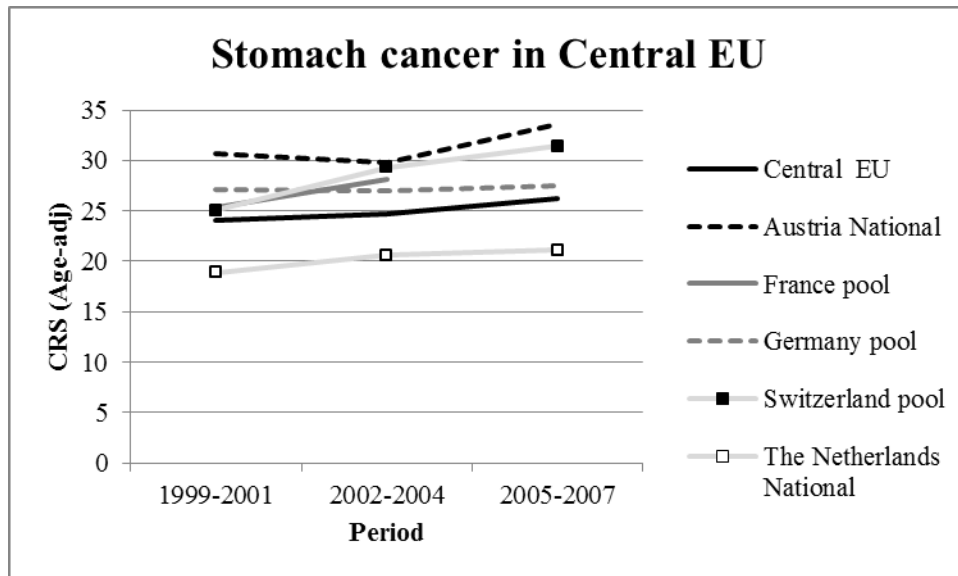

d)

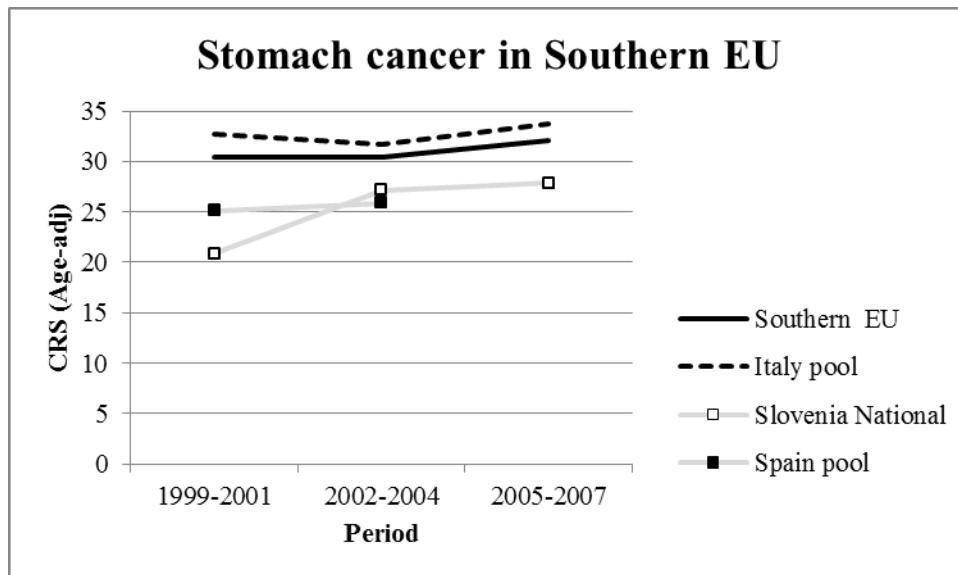

Note: Malta removed as no points are available due to small number of cases.

e)

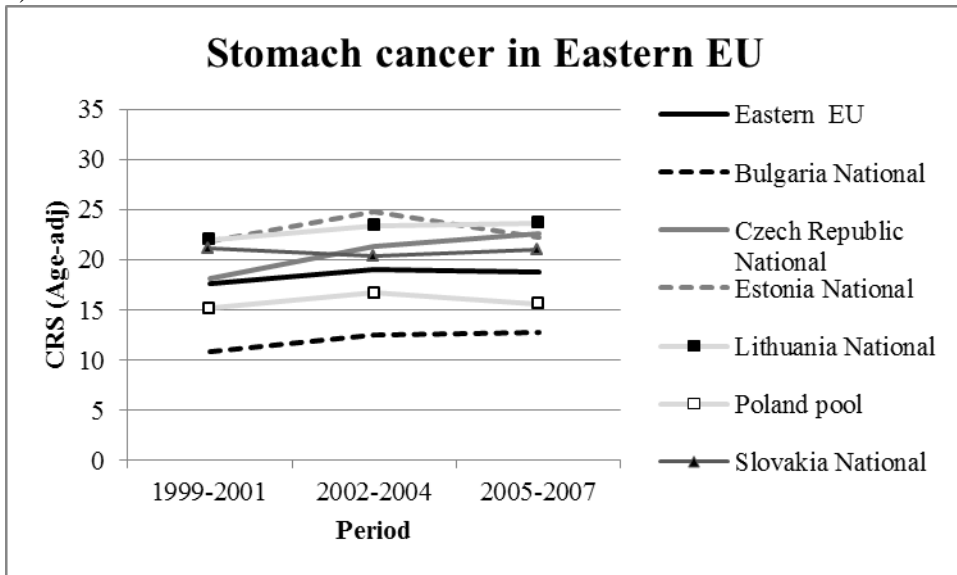

Note: Estonia removed as no points are available due to small number of cases.

f)

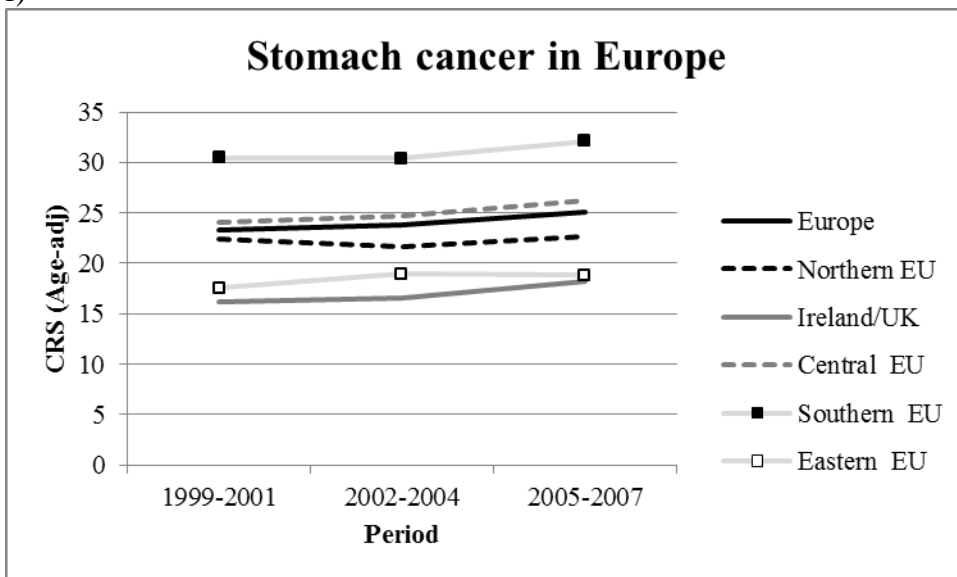

Ref supplement 2f previously presented de Angelis *et al.*, 2014[3]
