# Supplementary material
Source: PubMed Central journal article supplement (PMC5729902)

Supplement 3: Age-standardised 5-year RS for small intestine cancer in a) Northern Europe, b) Ireland and UK, c) Central Europe, d) Southern Europe, e) Eastern Europe and f) European average.

a)

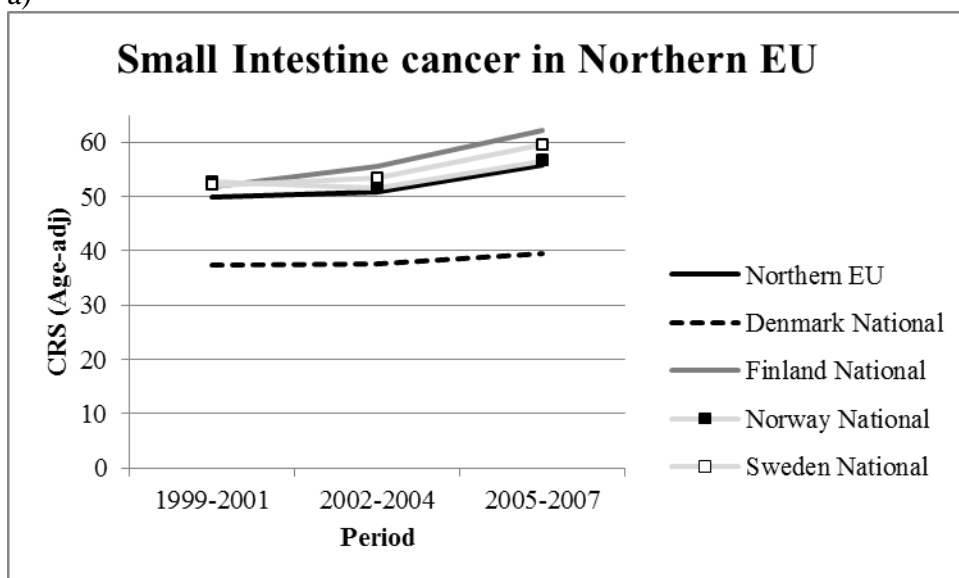

Note: Iceland removed as no points are available due to small number of cases

b)

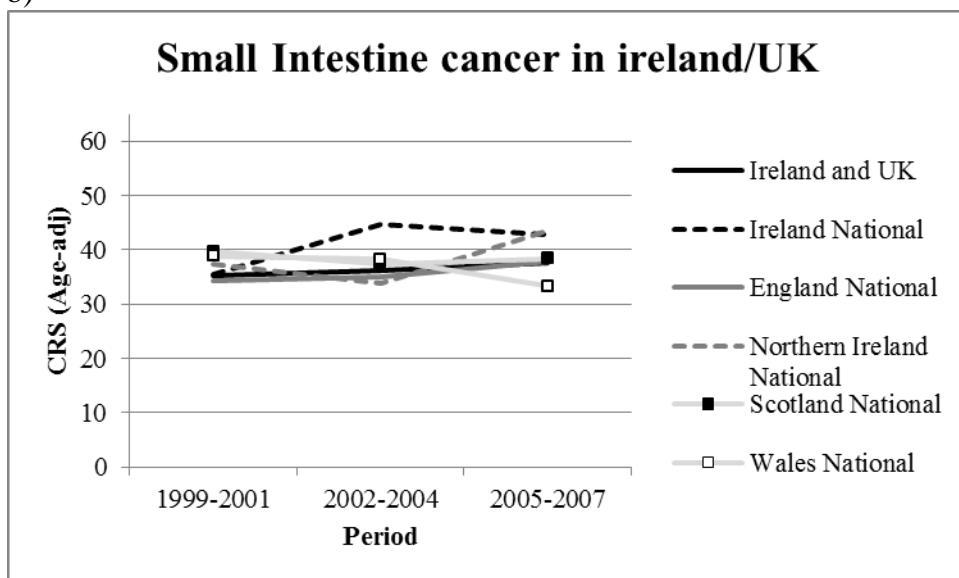

c)

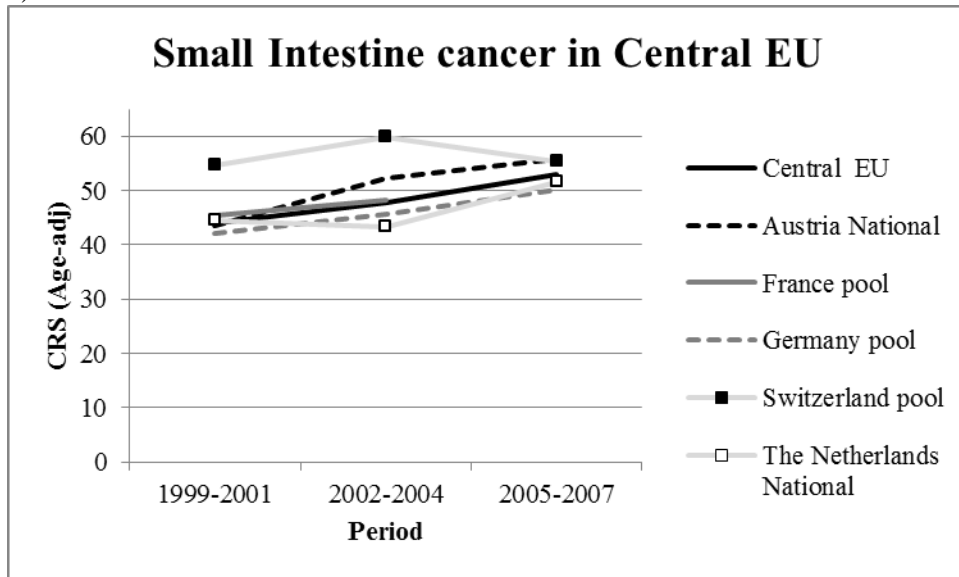

d)

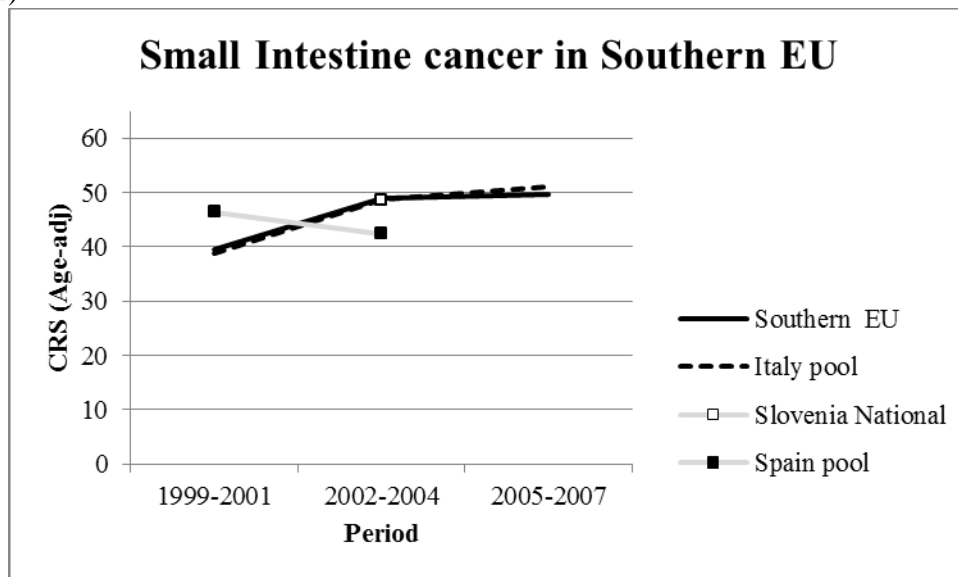

Note: Malta removed as no points are available due to small number of cases.

e)

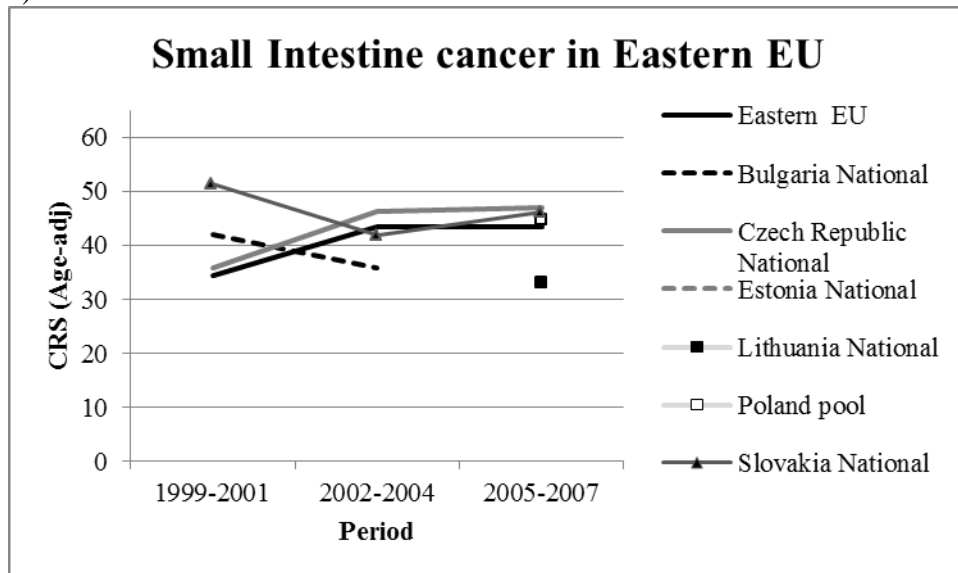

Note: Estonia removed as no points are available due to small number of cases

f)

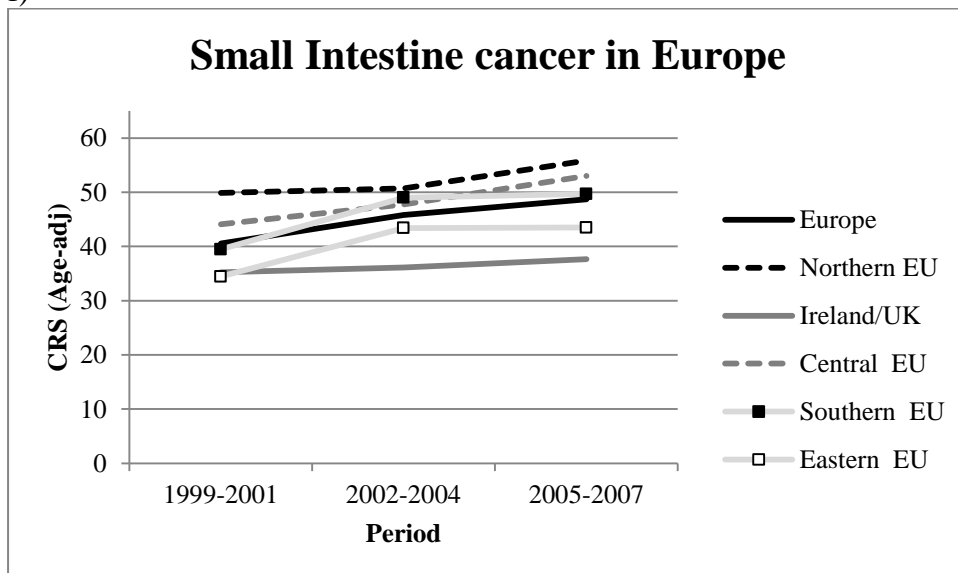

Supplement: NIHMS900952-supplement-3.pdf [file NIHMS900952-supplement-3.pdf]
